# Supplementary material for: Three Major Causes of Metabolic Retinal Degenerations and Three Ways to Avoid Them
Source: MDPI journal article supplement (doi:10.3390/ijms24108728), 2023-05-13
Supplement: s1 [file s1]

| Active ingredient                                     | Pharmacobiologic properties                                                                                                                                                                        | Structure of main marker molecules                                                      | Adverse effects, limitations                                                                                                                                                                                                                                                                       | Route of application | Target retinal diseases                          | References                                                            |
|-------------------------------------------------------|----------------------------------------------------------------------------------------------------------------------------------------------------------------------------------------------------|-----------------------------------------------------------------------------------------|----------------------------------------------------------------------------------------------------------------------------------------------------------------------------------------------------------------------------------------------------------------------------------------------------|----------------------|--------------------------------------------------|-----------------------------------------------------------------------|
| Acetazolamide sodium                                  | Carbonic anhydrase inhibitor (CAI)<br>Sulfonamide-derivate                                                                                                                                         | 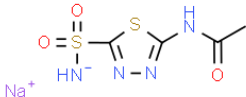      | Paresthesia of the acra, fatigue, depression, renal stones, and gastrointestinal complaints such as nausea and diarrhoea                                                                                                                                                                           | Oral                 | Glaucoma                                         | Mincione et al. (2008)<br>Farzam et al. (2022)<br>Hoyng et al. (2000) |
| Acetyl salicylic acid (Aspirin)                       | Anti-inflammatory: non-selective COX inhibitor: irreversibly inhibits COX-1 and COX-2 to decrease conversion of arachidonic acid to precursors of prostaglandins and thromboxanes<br>Inhibit NF-κB |       | Bleeding risk, inhibits platelet-aggregation                                                                                                                                                                                                                                                       | Oral                 | AMD<br>DR                                        | Zheng et al. (2007)<br>Al-Zamil et al. (2017)                         |
| Aflibercept (Eylea®)                                  | VEGF inhibitor<br>Dimeric glycoprotein<br>Suppress neovascularization and decrease vascular permeability                                                                                           | C <sub>4318</sub> H <sub>6788</sub> N <sub>1164</sub> O <sub>1304</sub> S <sub>32</sub> | Increased risk of stroke and myocardial infarction<br>Increase of IOP                                                                                                                                                                                                                              | Intravitreal         | AMD<br>DR                                        | Duh et al. (2017)                                                     |
| Apraclonidine hydrochloride* (also known as iopidine) | α2-adrenergic agonist<br>For prevention or reduction of IOP: reducing aqueous humor production and increasing uveoscleral outflow                                                                  |       | Allergic reactions including eyelid dermatitis, blepharoconjunctivitis and follicular conjunctivitis, hyperemia, itching, tearing, and occasionally foreign body sensation<br>Dry nose and dry mouth<br>Headache, fatigue, and sedation                                                            | Topical              | DR<br>Glaucoma (a short-term adjunctive therapy) | Koc et al. (2006)<br>Hoyng et al. (2000)                              |
| Betaxolol hydrochloride 0.25%                         | Competitive, β1-selective (cardioselective) adrenergic antagonist<br>Less effective than brimonidine 0.2%<br>Reduces IOP<br>Can be used in combination                                             |     | Blurred vision<br>Burning and stinging after topical administration<br>Has less effect on cardiac and pulmonary function than non-selective β-blockers<br>May induce adverse effects on the CNS such as depression, fatigue, impotence, and confusion<br>Special attention in patients with asthma | Topical              | Glaucoma                                         | Adkins et al. (1998)<br>Lesar (1987)                                  |

|                                  |                                                                                                                                                                                                                                                                                                                                                                                                                                                                                                                                                                                                                                                                                                                                                                                                        |                                                                                      |                                                                                                                                                                                                                                                                                                                                                                                                                                                                                                                                                                                        |                                                        |                 |                                                                                                                              |
|----------------------------------|--------------------------------------------------------------------------------------------------------------------------------------------------------------------------------------------------------------------------------------------------------------------------------------------------------------------------------------------------------------------------------------------------------------------------------------------------------------------------------------------------------------------------------------------------------------------------------------------------------------------------------------------------------------------------------------------------------------------------------------------------------------------------------------------------------|--------------------------------------------------------------------------------------|----------------------------------------------------------------------------------------------------------------------------------------------------------------------------------------------------------------------------------------------------------------------------------------------------------------------------------------------------------------------------------------------------------------------------------------------------------------------------------------------------------------------------------------------------------------------------------------|--------------------------------------------------------|-----------------|------------------------------------------------------------------------------------------------------------------------------|
| <b>Bevacizumab</b>               | <p>Recombinant monoclonal antibody</p> <p>Binds and inhibits all isoforms of VEGF, but with a lower affinity, and has a longer half-life than Ranibizumab</p> <p>Decreases central retinal thickness</p>                                                                                                                                                                                                                                                                                                                                                                                                                                                                                                                                                                                               | 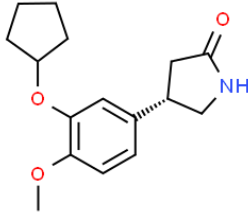   | <p>Corneal abrasion, lens injury, endophthalmitis, and retinal detachment</p> <p>Inflammation or uveitis, cataract progression, acute visual loss, CRAO, subretinal hemorrhages, and RPE tears</p> <p>Mild increases in blood pressure, transient ischemic attack, cerebrovascular accident, and death</p>                                                                                                                                                                                                                                                                             | Intravitreal                                           | AMD<br>DR       | <p>Iu et al (2007)</p> <p>Vaziri et al. (2015)</p> <p>Duh et al. (2017)</p>                                                  |
| <b>Bimatoprost 0.03%</b>         | <p>Prostamide</p> <p>Prostaglandin F2<math>\alpha</math> analogue</p> <p>Reduction of IOP: mildly stimulates aqueous humor outflow via the TM and uveoscleral pathways</p> <p>Significantly more effective than latanoprost</p>                                                                                                                                                                                                                                                                                                                                                                                                                                                                                                                                                                        |    | <p>Eye irritation, dry eye, itching, blurred vision, burning, discharge, allergy, and blepharitis,</p> <p>Eyelid pigmentation, changes in iris pigmentation, changes in eyelash pigmentation, growth, and thickness</p>                                                                                                                                                                                                                                                                                                                                                                | Topical                                                | Glaucoma        | <p>Lim et al (2008)</p> <p>Brubaker (2001)</p> <p>Easthope et al. (2002)</p> <p>Woodward et al. (2008)</p> <p>Alm (2014)</p> |
| <b>Brimonidine tartrate 0.2%</b> | <p>Highly selective <math>\alpha_2</math>-adrenoceptor agonist</p> <p>Reduces IOP via the uveoscleral pathway: reduction in aqueous humor production and an increase in aqueous humor outflow</p> <p>metabolized in the cornea</p> <p>Undergoes extensive hepatic metabolism, mainly by liver aldehyde oxidase to produce oxo- and dioxo-brimonidine derivatives</p> <p>urinary excretion was the major route of elimination</p> <p>vasoconstrictive effects</p> <p>Activate the intracellular kinases that enhance cell survival, indicate the anti-apoptotic genes such as BCL-2, or neuronal survival factors such as bFGF and inhibit the glutamate release and calcium influx into cells.</p> <p>In vivo mouse inflammation models displayed anti-inflammatory properties by inhibiting edema</p> |     | <p>Ocular allergy: eye lid dermatitis, blepharoconjunctivitis and follicular conjunctivitis</p> <p>Blurred vision</p> <p>Decreasing blood pressure, decreasing heart and respiratory rate, and prolonging the PR interval in the electrocardiogram</p> <p>Should be used with caution in individuals with severe cardiovascular disease, hepatic or renal impairment, depression, cerebral or coronary insufficiency, Raynaud's phenomenon, orthostatic hypotension or thrombangiitis obliterans antagonists</p> <p>Not be used in patients receiving monoamine oxidase inhibitors</p> | Topical<br>(0.08, 0.2 and 0.5% twice daily) or implant | AMD<br>Glaucoma | <p>Adkins et al. (1998)</p> <p>Jackson et al.(2015)</p> <p>Al-Zamil (2017)</p> <p>Weeler et al. (1999, 2001)</p>             |
| <b>Brinzolamide</b>              | <p>Highly specific, non-competitive, reversible carbonic anhydrase isoenzyme II inhibitor</p> <p>Decreases aqueous humor secretion by slowing the formation of bicarbonate ions with subsequent reduction in sodium and fluid transport</p> <p>Used in combinations</p>                                                                                                                                                                                                                                                                                                                                                                                                                                                                                                                                |  | <p>Stinging and burning after instillation (1.8-3%), foreign body sensation (1.8%), itching (1.2%), tearing (1.2%) and dry eyes (1.2%)</p> <p>Taste abnormalities (7.7%)</p>                                                                                                                                                                                                                                                                                                                                                                                                           | Topical                                                | Glaucoma        | <p>Hoyng et al. (2000)</p>                                                                                                   |
| <b>Brolucizumab (Beovu®)</b>     | <p>Human antibody fragment</p> <p>Capable of neutralizing all forms of VEGF-A</p>                                                                                                                                                                                                                                                                                                                                                                                                                                                                                                                                                                                                                                                                                                                      | Not Available                                                                        | <p>Blurred vision, hazy vision, increased sensitivity to light</p> <p>Eye pain or seeing floaters.</p>                                                                                                                                                                                                                                                                                                                                                                                                                                                                                 | Intravitreal                                           | AMD             | <p>Dugel et al. 2017</p>                                                                                                     |

|                                                |                                                                                                                                                                                                                                                                                                                                                                                                                                                                           |                                                                                      |                                                                                                                                                                                                                                                              |                                   |           |                                                   |
|------------------------------------------------|---------------------------------------------------------------------------------------------------------------------------------------------------------------------------------------------------------------------------------------------------------------------------------------------------------------------------------------------------------------------------------------------------------------------------------------------------------------------------|--------------------------------------------------------------------------------------|--------------------------------------------------------------------------------------------------------------------------------------------------------------------------------------------------------------------------------------------------------------|-----------------------------------|-----------|---------------------------------------------------|
|                                                |                                                                                                                                                                                                                                                                                                                                                                                                                                                                           |                                                                                      | Should not use in case of intraocular inflammation or infection<br>Do not use in pregnancy                                                                                                                                                                   |                                   |           | Motevassali et al . (2021)                        |
| <b>Carbachol 0.75, 1.5 and 3%</b>              | <p>Directly stimulates the muscarinic receptor site</p> <p>Also has an indirect effect by inhibiting cholinesterase</p> <p>Increase TM outflow through ciliary muscle contraction</p>                                                                                                                                                                                                                                                                                     | 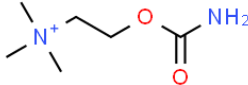   | Similar but more serious than pilocarpine                                                                                                                                                                                                                    | Topical                           | Glaucoma  | Hoyng et al. (2000)                               |
| <b>Carteolol 1 and 2%</b>                      | <p>A non-selective <math>\beta</math>-adrenergic antagonist</p> <p>Decreased aqueous humor production</p> <p>Used in combination</p>                                                                                                                                                                                                                                                                                                                                      |    | <p>Little or no effect on pupil size</p> <p>Irritation and pain shortly after application</p> <p>Should not be given to patients with cardiac or pulmonary insufficiency</p>                                                                                 | Topical or oral                   | Glaucoma  | El-Kamel et al. (2006)<br>Hoyng et al. (2000)     |
| <b>Clonidine</b>                               | <p><math>\alpha_2</math> adrenergic agonist</p> <p>Treat hypertension</p> <p>Imidazole derivate</p> <p>Easily passes the BBB, which may result in systemic hypotension by stimulation of the vasomotor centers in the brainstem</p>                                                                                                                                                                                                                                       |    | <p>Allergic reactions including eyelid dermatitis, blepharoconjunctivitis and follicular conjunctivitis</p> <p>Hyperaemia, itching, tearing, and occasionally foreign body sensation</p> <p>Dry nose and dry mouth</p> <p>Headache, fatigue and sedation</p> | Topical                           | Glaucoma  | Hoyng et al. (2000)                               |
| <b>Conbercept (Lumitin<sup>®</sup>, 0.5mg)</b> | <p>Recombinant fusion protein with high affinity to all VEGF isoforms and PlGF</p> <p>Significantly reduced the CRT</p>                                                                                                                                                                                                                                                                                                                                                   | Not Available                                                                        | <p>Only approved in China</p> <p>Efficacy and safety not yet elucidated in other racial populations</p>                                                                                                                                                      | Intravitreal                      | AMD<br>DR | Zhang et al. (2018)                               |
| <b>Cyclosporine</b>                            | <p>Calcineurin inhibitor</p> <p>Immunomodulatory agent</p> <p>Inhibiting the production of cytokines (mainly IL-2) involved in the regulation of T cell activation.</p> <p>Suppressed the production of MHC class 2 (I-a) antigen - inducing lymphokines thereby inhibiting intraocular inflammation</p> <p>Attenuation of retinal expression of inflammatory mediators (IL-1 and TGF-<math>\beta</math>) and reduced edema and disorganization of the retinal layers</p> |  | <p>200 <math>\mu</math>g showed adverse histologic changes in the retina in the form of patchy loss of outer segments of the retina.</p>                                                                                                                     | Oral,<br>Topical,<br>Intravitreal | DR        | Hasan et al. (2022)<br>Wang et al.<br>Zong et al. |

|                                                              |                                                                                                                                                                                                                                                                                                                             |                                                                                                                                                                                                 |                     |                 |                                                                                               |
|--------------------------------------------------------------|-----------------------------------------------------------------------------------------------------------------------------------------------------------------------------------------------------------------------------------------------------------------------------------------------------------------------------|-------------------------------------------------------------------------------------------------------------------------------------------------------------------------------------------------|---------------------|-----------------|-----------------------------------------------------------------------------------------------|
| <b>Dexamethasone</b><br><b>(Ozurdex<sup>®</sup>, 700 µg)</b> | <p>Corticosteroid implant<br/>Improve central foveal thickness</p> 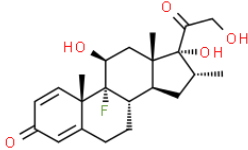                                                                                                                                                                       | <p>Cataract formation</p>                                                                                                                                                                       | <p>Intravitreal</p> | <p>DR</p>       | <p>Boyer et al.<br/>(2014)</p>                                                                |
| <b>Diclofenamide</b>                                         | <p>Carbonic anhydrase inhibitor (CAI)<br/>Reduces IOP<br/>Suppressing the secretion of aqueous humor</p>                                                                                                                                  | <p>Numbness/tingling, change in the sense of taste, nausea, diarrhea, weight loss, muscle spasms/twitching, tiredness, dizziness, or drowsiness may occur</p>                                   | <p>Oral</p>         | <p>Glaucoma</p> | <p>Mincione et al.<br/>(2008)</p>                                                             |
| <b>Dipivefrin hydrochloride</b>                              | <p>Phenol esters<br/>Prodrug of epinephrine<br/>Reduces IOP<br/>Stimulating <math>\alpha</math>- and/or <math>\beta</math>2-adrenergic receptors<br/>More lipophilic than epinephrine and penetrates the cornea 17 times more easily</p>  | <p>Little or no pharmacologically activity until it is hydrolyzed into epinephrine inside the human eye</p>                                                                                     | <p>Topical</p>      | <p>Glaucoma</p> | <p>Arthur et al<br/>(2011)</p>                                                                |
| <b>Dorzolamide hydrochloride 2%</b>                          | <p>Carbonic anhydrase isoenzyme II inhibitor in the ciliary process that regulates ion balance and fluid pressure in the eyes<br/>Non-bacteriostatic sulfonamide derivative<br/>Reduces IOP</p>                                          | <p>Stinging (12%), ocular burning (19%), temporarily blurred vision (9%), itching (12%) and tearing (7%), eyelid oedema and conjunctivitis (4 and 4.5%)<br/>Electrolyte imbalance, acidosis</p> | <p>Topical</p>      | <p>Glaucoma</p> | <p>Martens-Lobenhoffer et al. (2002)<br/>Balfour et al. (1997)<br/>Loftsson et al. (2012)</p> |
| <b>Echothiophate iodide</b>                                  | <p>Long-acting irreversible acetylcholinesterase inhibitor<br/>Used in combination</p>                                                                                                                                                  | <p>Blurred vision or change in near or distant vision and eye pain</p>                                                                                                                          | <p>Topical</p>      | <p>Glaucoma</p> | <p>Schmidt et al. (2010)</p>                                                                  |

|                                              |                                                                                                                                                                                                                                                                                                                                                                                                |                                                                                      |                                                                                                                                                                                                                                                                                                                                                                                             |              |                |                                                                                    |
|----------------------------------------------|------------------------------------------------------------------------------------------------------------------------------------------------------------------------------------------------------------------------------------------------------------------------------------------------------------------------------------------------------------------------------------------------|--------------------------------------------------------------------------------------|---------------------------------------------------------------------------------------------------------------------------------------------------------------------------------------------------------------------------------------------------------------------------------------------------------------------------------------------------------------------------------------------|--------------|----------------|------------------------------------------------------------------------------------|
| <b>Fasudil</b>                               | <p>Specific ROCK inhibitor<br/>Reducing neutrophil-induced endothelial injury<br/>significantly increased eNOS phosphorylation<br/>Used in combination</p>                                                                                                                                                                                                                                     | 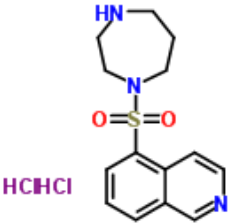    | Systemic vasodilation and hypotension                                                                                                                                                                                                                                                                                                                                                       | Intravitreal | DR<br>Glaucoma | Rotschild et al. (2005)                                                            |
| <b>Guanethidine monosulfate</b>              | <p>Postganglionic sympathetic nerve terminal blocker<br/>Prevents the release of norepinephrine from nerve terminals<br/>Suppresses equally the responses mediated by <math>\alpha</math>- and <math>\beta</math>-adrenergic receptors but does not produce parasympathetic blockade<br/>Guanethidine is converted by the liver to three metabolites, which are excreted in the urine</p>      |    | Drowsiness, dizziness, tiredness, or confusion                                                                                                                                                                                                                                                                                                                                              | Oral         | Glaucoma       |                                                                                    |
| <b>Infliximab</b>                            | <p>TNF-<math>\alpha</math> Inhibitor<br/>Chimeric monoclonal IgG1 antibody<br/>Disrupts the proinflammatory cascade signaling so downregulate<br/>Proinflammatory cytokines, such as IL-1, IL6 etc.<br/>Reduction of lymphocyte and leukocyte migration, apoptosis of TNF producing cells (activated monocytes), and reduction of endothelial adhesion molecules and acute phase proteins.</p> | $C_{6428}H_{9912}N_{1694}O_{1987}S_{46}$                                             | Can be retinotoxic: decline in amplitude and increase latency<br>anterior uveitis                                                                                                                                                                                                                                                                                                           | Intravitreal | AMD            | Theodossiadis et al. (2009)                                                        |
| <b>Latanoprost 0.005%</b>                    | <p>Isopropyl ester prodrug<br/>Analogue of prostaglandin F2<math>\alpha</math>, PhXA34<br/>Decreases IOP by increasing uveoscleral outflow</p>                                                                                                                                                                                                                                                 |   | <p>Lower systemic adverse effects than timolol<br/>Stinging, burning, or tearing after application<br/>Punctate keratitis, blurred vision, eye pain and foreign body sensations<br/>Iris pigmentation<br/>Infrequent conjunctival hyperemia, pigmentation of periocular tissues, eyelash changes, hypertrichosis, and ocular irritation<br/>Should be applied preferably in the evening</p> | Topical      | Glaucoma       | Alm (2014)<br>Sjoquist et al. (2002)                                               |
| <b>Levobunolol hydrochloride 0.5%, 0.25%</b> | <p>Nonselective <math>\beta</math>-adrenergic blocking agents: equally effective at <math>\beta(1)</math>- and <math>\beta(2)</math>-receptor sites<br/>Longer acting than timolol</p>                                                                                                                                                                                                         |  | Systemic pulmonary and cardiovascular effects                                                                                                                                                                                                                                                                                                                                               | Topical      | Glaucoma       | Gonzalez et al. (1987)<br>Lesar (1987)<br>Novack (1986)<br>Ishibashi et al. (2003) |

|                                                     |                                                                                                                                                                               |                                                                                      |                                                                                                                                                                                                                                                                                                                                                  |         |                |                                       |
|-----------------------------------------------------|-------------------------------------------------------------------------------------------------------------------------------------------------------------------------------|--------------------------------------------------------------------------------------|--------------------------------------------------------------------------------------------------------------------------------------------------------------------------------------------------------------------------------------------------------------------------------------------------------------------------------------------------|---------|----------------|---------------------------------------|
| <b>Memantine</b>                                    | <p>NMDA receptor blocker<br/>Prevents RGC loss<br/>Reduces elevated VEGF protein levels<br/>Improved amplitudes of ERG a- and b-waves</p>                                     | 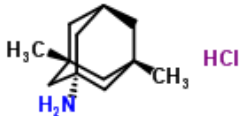    | No known adverse effect                                                                                                                                                                                                                                                                                                                          | Oral    | DR<br>Glaucoma | Kusari et al<br>(2007)                |
| <b>Methazolamide</b>                                | <p>Carbonic anhydrase inhibitor<br/>Sulfonamide derivative<br/>The reduction of elevated IOP in patients who are insufficiently responsive to <math>\beta</math>-blockers</p> |    | Kidney stones, signs of infection, easy bleeding/bruising, numbness or tingling of hands/feet, tinnitus                                                                                                                                                                                                                                          | Oral    | Glaucoma       | Skorobohach et al. (2003)             |
| <b>Metipranolol hydrochloride 0.1, 0.3 and 0.6%</b> | <p>Non-selective <math>\beta</math>-adrenergic antagonist<br/>the reduction of elevated IOP by inhibiting aqueous humour formation<br/>Used in combination</p>                |    | <p>Little or no effect on pupil size<br/>Corneal anaesthetic effect<br/>Mild conjunctival hyperaemia<br/>Slight reduction in pulse rate and systolic blood pressure<br/>Plasma HDL, cholesterol levels are increased, and plasma triglyceride levels are reduced<br/>Should be avoided in patients with cardiovascular or pulmonary diseases</p> | Topical | Glaucoma       | Hoyng et al. (2000)                   |
| <b>Nepafenac (Nevanac®)</b>                         | <p>Nonsteroidal anti-inflammatory drug that inhibits COX-1 and COX-2 and the synthesis of proinflammatory prostaglandins<br/>Inhibits caspase 3 and caspase 6</p>             |   | Blurred vision, eye pain or itching, foreign body sensation, sticky sensation of the eyelids                                                                                                                                                                                                                                                     | Topical | DR             | Kern et al. (2010)                    |
| <b>Netarsudil dihydrochloride 0.02%</b>             | <p>Rho kinase inhibitor with norepinephrine transport inhibitory activity<br/>Reduction of IOP</p>                                                                            |  | Conjunctival hyperemia, corneal verticillata, instillation site pain and erythema, and even conjunctival hemorrhage, corneal staining, blurred vision, increased lacrimation, erythema of eyelid, and reduced visual acuity                                                                                                                      | Topical | Glaucoma       | Lin et al.(2017)<br>Ren et al. (2016) |

|                                                       |                                                                                                                                                                                                                                                                                                                                                                                                                                                                                                                        |                                                                                      |                                                                                                                                                                                                                                                                                                                                         |                     |                        |                                                                                                                                      |
|-------------------------------------------------------|------------------------------------------------------------------------------------------------------------------------------------------------------------------------------------------------------------------------------------------------------------------------------------------------------------------------------------------------------------------------------------------------------------------------------------------------------------------------------------------------------------------------|--------------------------------------------------------------------------------------|-----------------------------------------------------------------------------------------------------------------------------------------------------------------------------------------------------------------------------------------------------------------------------------------------------------------------------------------|---------------------|------------------------|--------------------------------------------------------------------------------------------------------------------------------------|
| <b>Pegaptanib (Macugen®,<br/>0.3 mg)</b>              | <p>28-base RNA aptamer that selectively binds to and blocks the activity of VEGF</p>                                                                                                                                                                                                                                                                                                                                                                                                                                   | 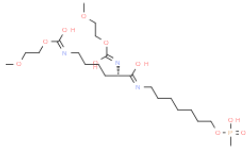   | <p>Eye pain, vitreous floaters, keratitis<br/>rare (0.1%): endophthalmitis, traumatic injury to the lens, and retinal detachment</p>                                                                                                                                                                                                    | <p>Intravitreal</p> | <p>AMD</p>             | <p>Vavvas et al. (2006)</p>                                                                                                          |
| <b>Pilocarpine<br/>hydrochloride 4%, 2%,<br/>1%</b>   | <p>Muscarinic cholinergic agonist<br/>Produces contraction of the iris sphincter muscle and ciliary muscle: causes miosis, spasm of accommodation<br/>Reduces the outflow resistance of aqueous humor through the TM and Schlemm's canal<br/>Used in combinations</p>                                                                                                                                                                                                                                                  |    | <p>Blurred vision especially in younger patients, causing myopia by forward displacement and thickening of the lens<br/>Conjunctival hyperemia, lens opacities and retinal detachments<br/>paradoxical effects on the cardiovascular system: Bradycardia and tachycardia<br/>Vomiting, nausea, diarrhea, bronchospasm, and sweating</p> | <p>Topical</p>      | <p>Glaucoma</p>        | <p>Adkins et al. (1998)</p>                                                                                                          |
| <b>Ranibizumab (3 mg<br/>and 0.5 mg)</b>              | <p>Recombinant humanized monoclonal antibody and VEGF-A antagonist<br/>Inhibits the formation of new blood vessels or neovascularization<br/>also reduce retinal thickness</p>                                                                                                                                                                                                                                                                                                                                         | <p><math>C_{2158}H_{3282}N_{562}O_{681}S_{12}</math></p>                             | <p>Endophthalmitis, retinal detachment, and traumatic cataract</p>                                                                                                                                                                                                                                                                      | <p>Intravitreal</p> | <p>AMD<br/>DR</p>      | <p>Gaudreault et al. (2007)<br/>Kourlas et al. (2007)<br/>Akiyode et al. (2016)<br/>Al-Zamil et al. (2017)<br/>Duh et al. (2017)</p> |
| <b>Ripasudil<br/>hydrochloride<br/>dihydrate 0.4%</b> | <p>Rho kinase inhibitor<br/>Hydrochloride hydrate (K-115)<br/>Decreasing IOP in a dose-dependent manner and increasing flow facility<br/>Inducing cytoskeletal change<br/>Used in combination with prostaglandin analogues</p>                                                                                                                                                                                                                                                                                         |   | <p>Mild to moderately severe conjunctival hyperemia<br/>Mild conjunctival follicles<br/>Ocular irritation, abnormal sensation in the eye<br/>Conjunctival hemorrhage</p>                                                                                                                                                                | <p>Topical</p>      | <p>DR<br/>Glaucoma</p> | <p>Kaneko et al. (2016)</p>                                                                                                          |
| <b>Sirolimus (Rapamune)</b>                           | <p>Inhibiting T-lymphocyte activation and proliferation stimulated by antigens and cytokines such as IL-2, IL-4, and IL-15<br/>Binds to the cytoplasmic receptor FKBP12, an immunophilin, to form an immunosuppressive complex<br/>FKBP12-sirolimus complex binds to and inhibits the activation of the mTOR (serine/threonine-specific protein kinase - cell growth, proliferation, survival, mobility, and angiogenesis)<br/>mTOR regulates the downstream signaling pathways involved in cell survival, such as</p> |  | <p>No known adverse effect</p>                                                                                                                                                                                                                                                                                                          | <p>Oral</p>         | <p>AMD</p>             | <p>Hasan et al. (2022)</p>                                                                                                           |

|                                                           |                                                                                                                                                                                                                                                                                                                                                                                                                          |                                                                                      |                                                                                                                                                                                                                                                                                                                                                                                                                                                                                                                                                                  |              |           |                                                                                          |
|-----------------------------------------------------------|--------------------------------------------------------------------------------------------------------------------------------------------------------------------------------------------------------------------------------------------------------------------------------------------------------------------------------------------------------------------------------------------------------------------------|--------------------------------------------------------------------------------------|------------------------------------------------------------------------------------------------------------------------------------------------------------------------------------------------------------------------------------------------------------------------------------------------------------------------------------------------------------------------------------------------------------------------------------------------------------------------------------------------------------------------------------------------------------------|--------------|-----------|------------------------------------------------------------------------------------------|
|                                                           | the phosphatidylinositol-3 kinase (PI3K)/Akt signaling pathway                                                                                                                                                                                                                                                                                                                                                           |                                                                                      |                                                                                                                                                                                                                                                                                                                                                                                                                                                                                                                                                                  |              |           |                                                                                          |
| <b>Tafluprost</b>                                         | <p>Ester prodrug</p> <p>Prostaglandin analogue high affinity for receptor PGF2</p> <p>Reducing elevated IOP by increasing the outflow of aqueous humor</p>                                                                                                                                                                                                                                                               | 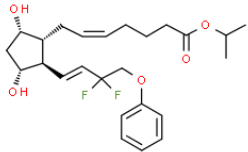   | <p>Eye pain or redness, itchy or watery eyes</p> <p>Increased sensitivity to light or severe redness or burning of the eyes after using the drops</p>                                                                                                                                                                                                                                                                                                                                                                                                            | Topical      | Glaucoma  | <p>Papadia et al. (2011)</p> <p>Pantcheva et al. (2011)</p> <p>Takagi et al. (2004)</p>  |
| <b>Timolol maleate 0.5%, 0.25% or timolol hemihydrate</b> | <p>Non-selective <math>\beta</math>-adrenergic blocker</p> <p>Less effective than brimonidine 0.2%</p> <p>Reduces IOP by decreasing the secretion of aqueous humor not by increasing outflow facility</p> <p>Downregulates the adenylate cyclase enzyme by inhibiting <math>\beta</math>2-adrenoceptor sites at the ciliary processes</p> <p>Excreted in the urine, metabolized by CYP2D6</p> <p>Used in combination</p> |    | <p>Severe adverse cardiovascular and respiratory effects</p> <p>Dry eyes, local hypersensitivity reactions, blurred vision, induce conjunctival hyperemia, burning, stinging or superficial punctate keratitis, reduces tear flow</p> <p>May cause bradycardia, arrhythmia, congestive heart failure, and syncope by Adam-Stokes syndrome</p> <p>May induce anxiety, depression, sexual impotence, fatigue, confusion, disorientation, and hallucinations</p> <p>Should be avoided in patients with lung disease, diabetic mellitus, or hypoglycemic attacks</p> | Topical      | Glaucoma  | <p>Adkins et al. (1998)</p> <p>Watanabe et al. (1983)</p> <p>Volotinen et al. (2011)</p> |
| <b>Travoprost</b>                                         | <p>Prostaglandin F2<math>\alpha</math> analogue</p> <p>Isopropyl ester prodrug</p> <p>Lowering IOP by increasing the outflow of aqueous humor via TM and uveoscleral pathways</p>                                                                                                                                                                                                                                        |   | <p>Eye irritation, dry eye, itching, blurred vision, burning, discharge, allergy, and blepharitis,</p> <p>Iris pigmentation, hypertrichosis</p>                                                                                                                                                                                                                                                                                                                                                                                                                  | Topical      | Glaucoma  | <p>Arranz-Marquez et al. (2008)</p> <p>Costagliola et al. (2009)</p>                     |
| <b>Triamcinolone acetonide 25 mg</b>                      | Synthetic glucocorticoid                                                                                                                                                                                                                                                                                                                                                                                                 |  | <p>Risks of endophthalmitis, retinal tears/detachment, vitreous hemorrhage, elevated IOP, and cataract</p>                                                                                                                                                                                                                                                                                                                                                                                                                                                       | Intravitreal | AMD<br>DR | <p>Iu et al. (2007)</p> <p>Vaziri et al. (2015)</p>                                      |



|                                               |                                                                                                                                                                                                                                                                                                                                                                                                                                                                                                                                                                    |                                                                                    |                                                                                                   |         |                       |                                                                                                 |
|-----------------------------------------------|--------------------------------------------------------------------------------------------------------------------------------------------------------------------------------------------------------------------------------------------------------------------------------------------------------------------------------------------------------------------------------------------------------------------------------------------------------------------------------------------------------------------------------------------------------------------|------------------------------------------------------------------------------------|---------------------------------------------------------------------------------------------------|---------|-----------------------|-------------------------------------------------------------------------------------------------|
| <b>Trimetazidine</b>                          | <p>Piperazine derivative<br/>         Selective inhibition the oxidation of free fatty acids and secondarily increases glucose oxidation<br/>         Enhancement of metabolic processes in the cell, counteraction of Na<sup>+</sup> and Ca<sup>2+</sup> accumulation and mitochondrial damage directly decreased ROS production<br/>         Antioxidative and anti-inflammatory effects: reduced the production of inflammatory cytokines in vitro via the regulation of the nuclear factor erythroid 2-related factor 2/heme oxygenase 1/caspase-8 pathway</p> | 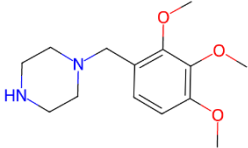 | No known adverse effect                                                                           | Oral    | AMD<br>DR<br>Glaucoma | Pogatsa (2001)<br>Kaszuba-Barthowiak et al. (2008)<br>Novak et al. (2007)<br>Wan et al. (2017). |
| <b>Unoprostone isopropyl (Rescula®) 0.15%</b> | <p>Prostaglandin analogue<br/>         Lowering IOP by increasing the outflow of aqueous humor via the uveoscleral pathway, but also it has some effect on trabecular outflow in animals</p>                                                                                                                                                                                                                                                                                                                                                                       |  | Conjunctival hyperemia (7%), corneal erosion (2%) and blepharitis (1%)<br>No effect on iris color | Topical | Glaucoma              | Fung et al. (2014)                                                                              |

Color coding: Green: pharmacological agents take action on antiapoptotic and anti-aging mechanisms. Orange: pharmacological agents take action on anti-vessel formation mechanisms (anti-VEGF, anti-HIF1 $\alpha$ ). Yellow: pharmacological agents take action on anti-inflammatory mechanisms. Abbreviations: BBB = blood brain barrier, CNS = central nervous system, COX = cyclooxygenase, CRAO = central retinal artery occlusion, DR = diabetic retinopathy, ERG = electroretinography, FK506BP12 = FK506-binding protein-12, HDL = high density lipoprotein, IL = interleukin, IOP = intraocular pressure, MHC = major histocompatibility complex, mTOR = mammalian target of rapamycin, NF- $\kappa$ B = nuclear factor kappa B, NMDA = N-methyl-D-aspartate, RGC = retinal ganglion cell, RPE = retinal pigmentepithelium, TGF = transforming growth factor, TM = trabecular meshwork, VEGF = vascular endothelial growth factor
